# Supplementary material
Source: MDPI journal article supplement (https://www.mdpi.com/2073-4344/10/1/127)
Supplement: s1 [file s1]

## Supporting Materials

### (1) $^1\text{H}$ NMR of COOH-IL and COOH-PIL

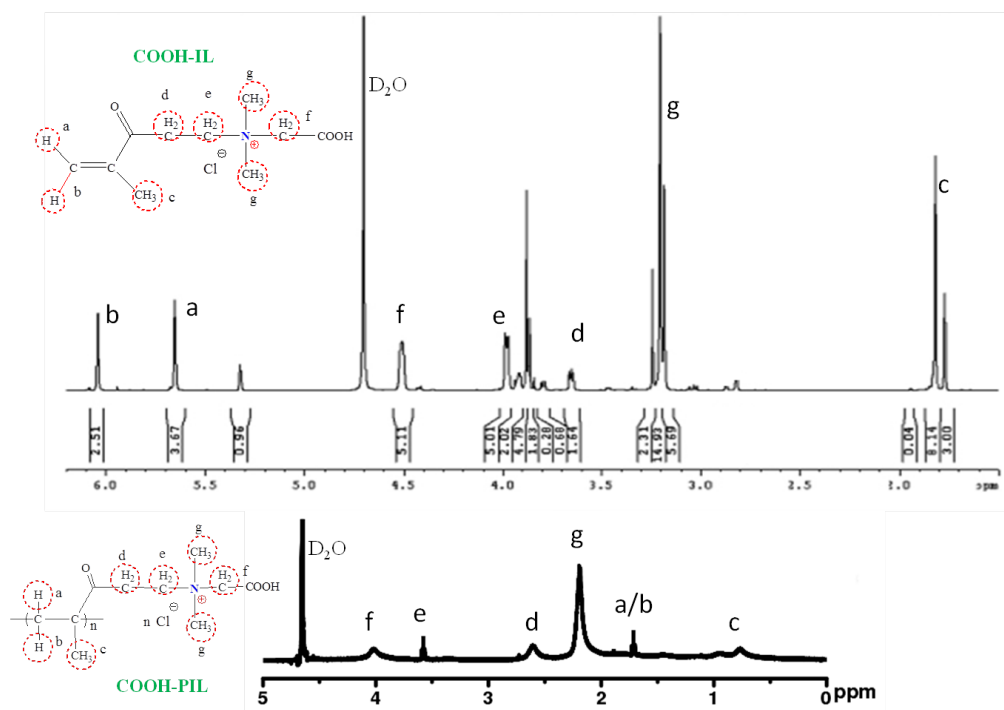

Fig S1

### (2) GC-MS Spectra of Cyclopentanone Oxidation Product

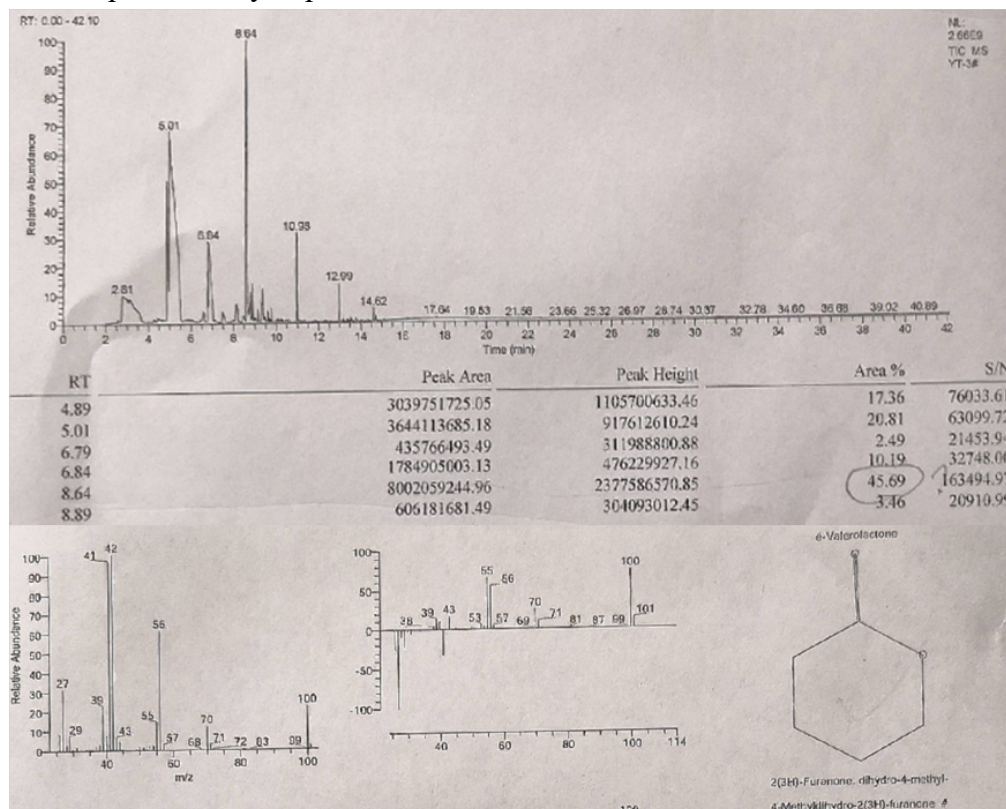

Fig S2

### (3) GC-MS Spectra of Cyclohexanone Oxidation Product

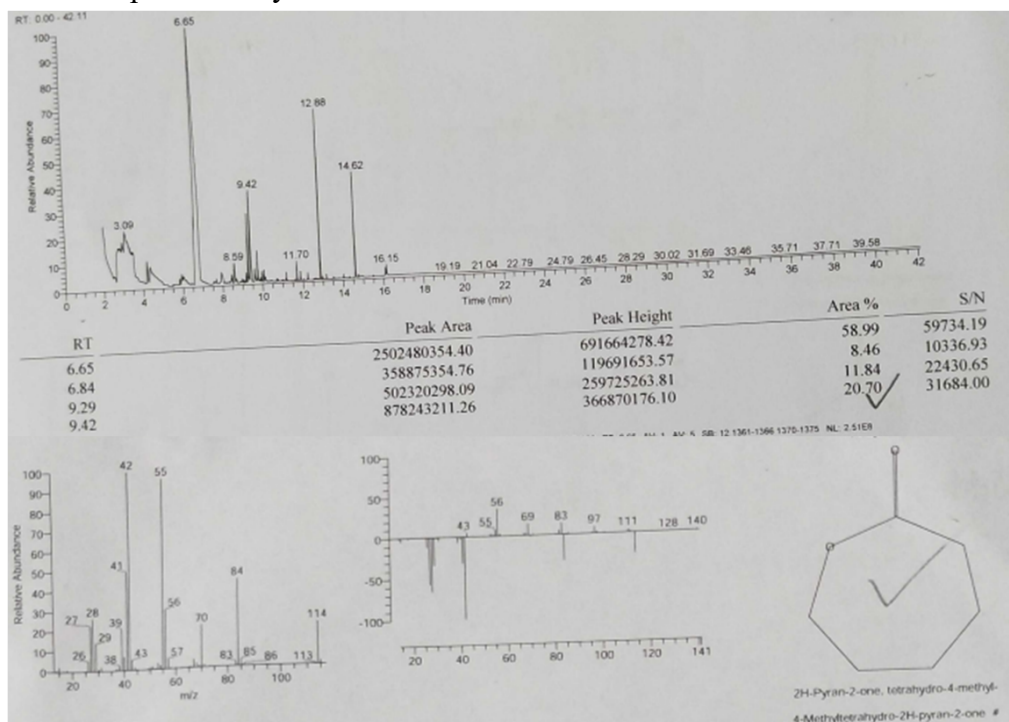

Fig S3
